# Supplementary figures and images for: Identify differential genes and cell subclusters from time-series scRNA-seq data using scTITANS
Source: PubMed Central journal article supplement — Comput Struct Biotechnol J. 2021 Jul 26;19:4132–41. doi: 10.1016/j.csbj.2021.07.016 (PMC8342909; doi:10.1016/j.csbj.2021.07.016), 2021-07-26

(a)

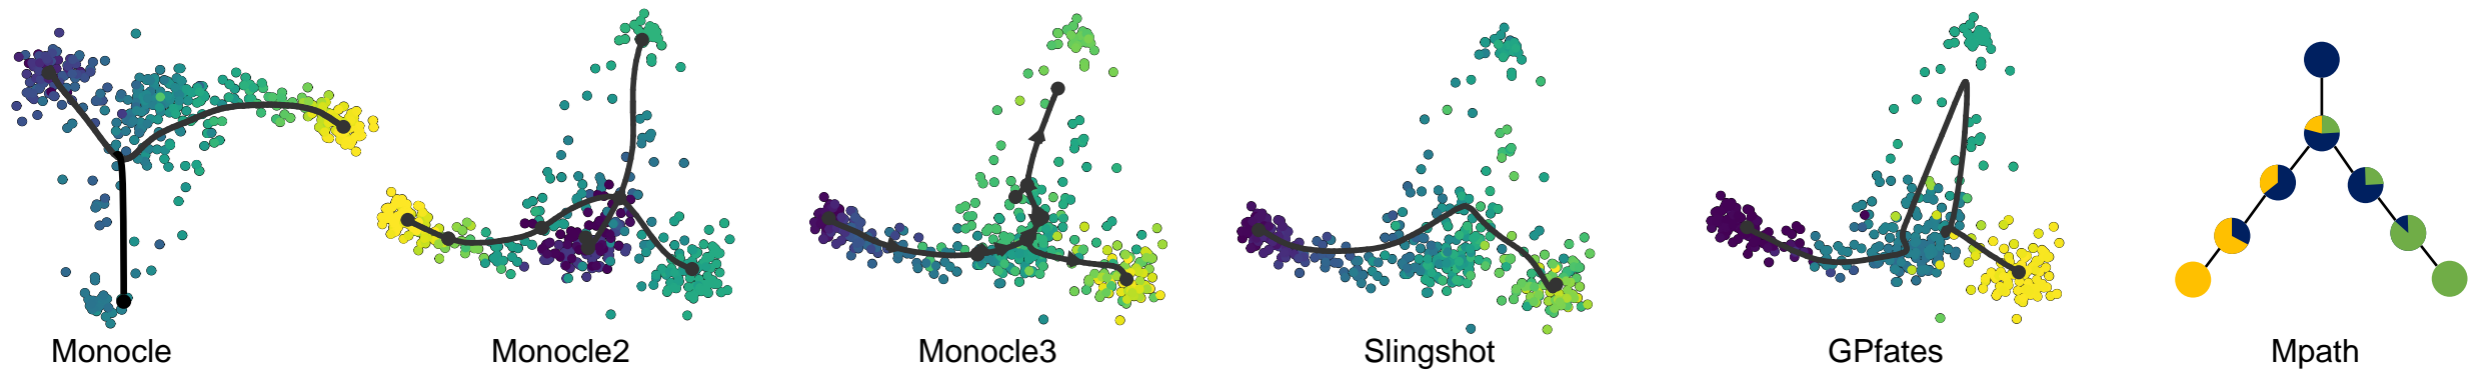

(b)

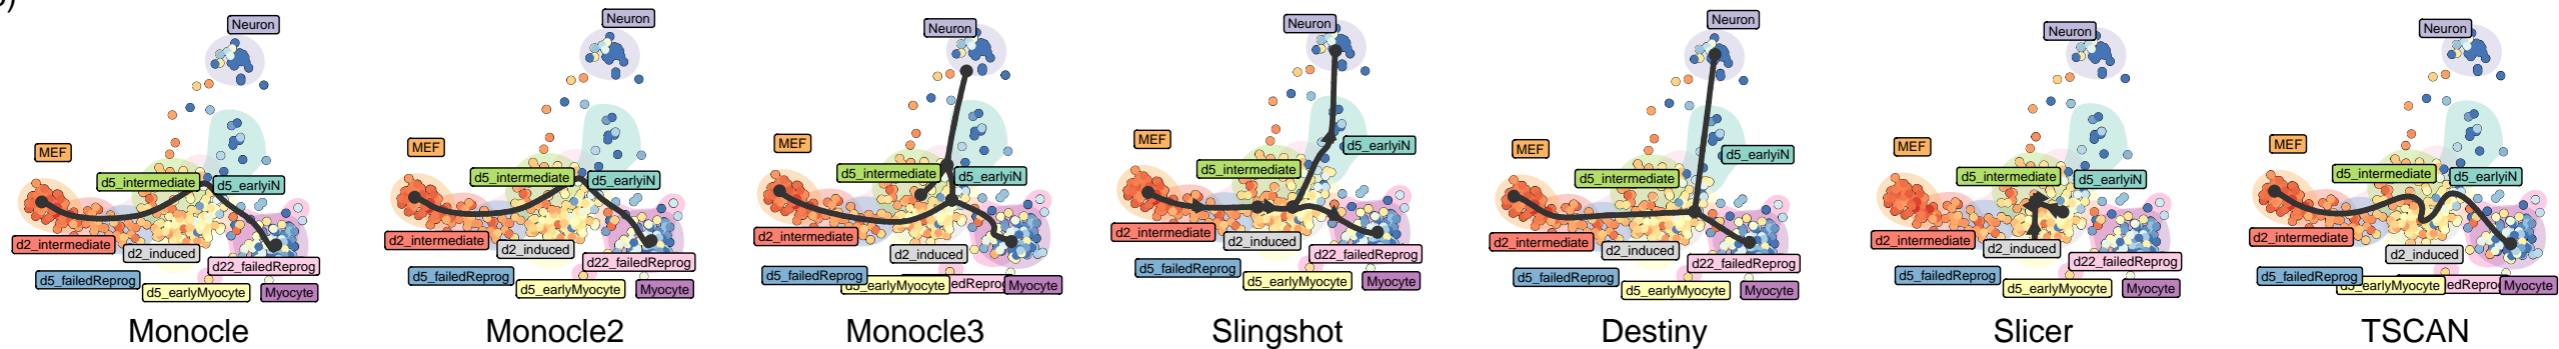

(c)

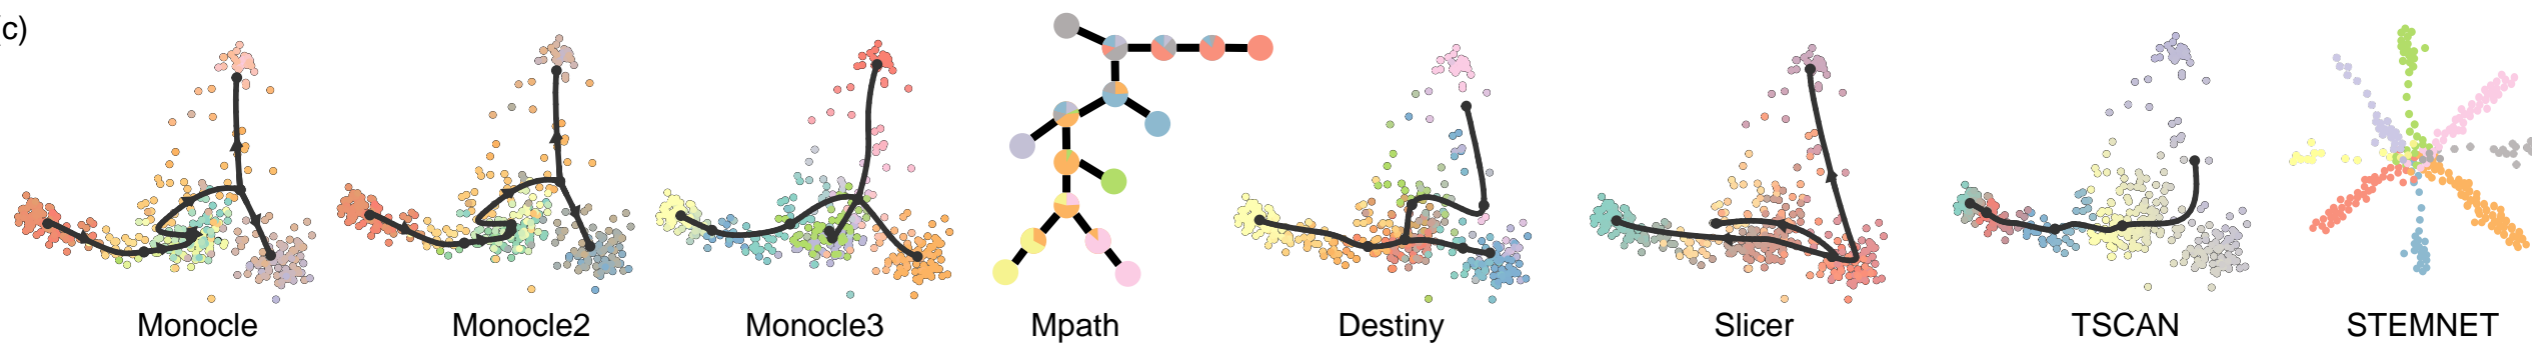

Supplement: mmc2.pdf [file mmc2.pdf]

**(a)**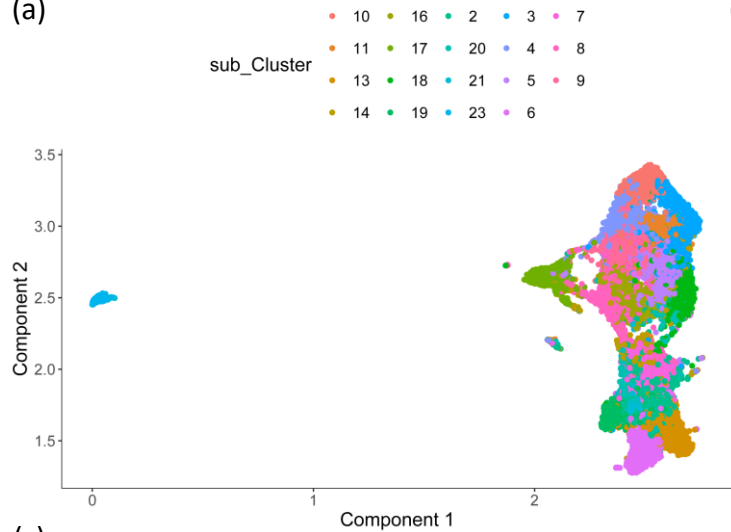**(b)**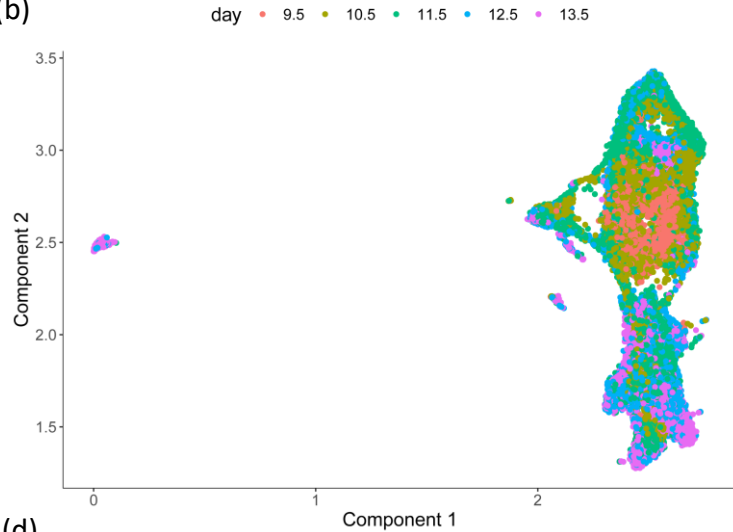**(c)**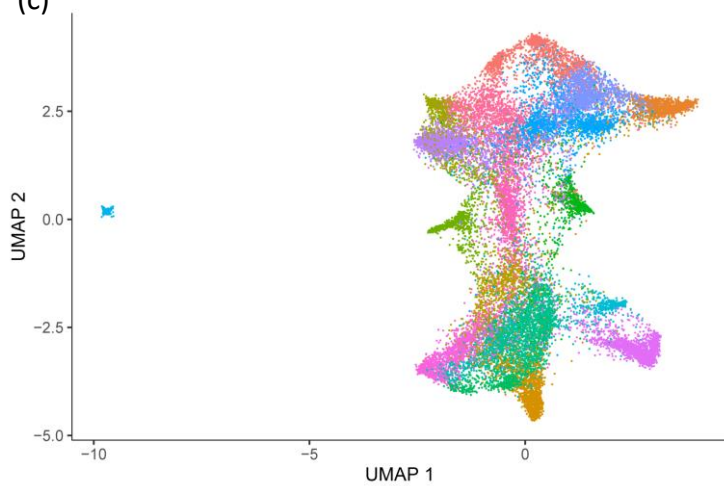**(d)**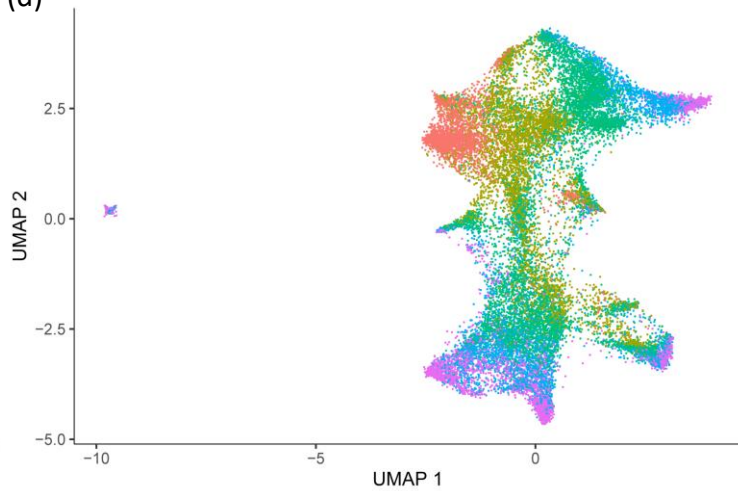

Supplement: mmc3.pdf [file mmc3.pdf]

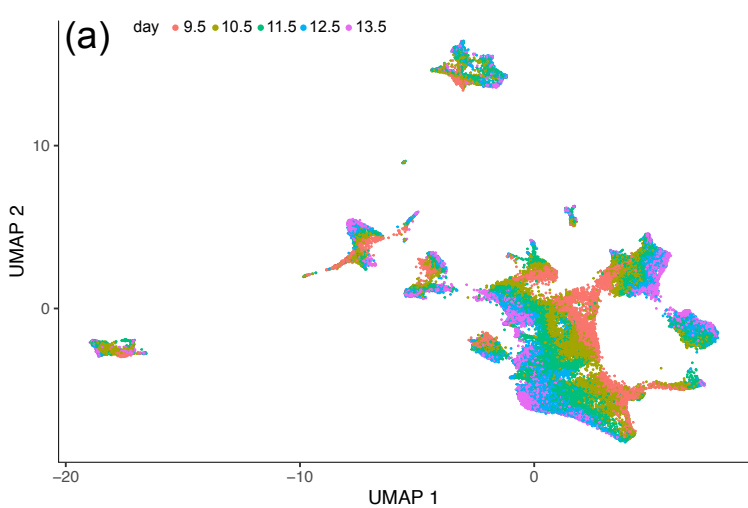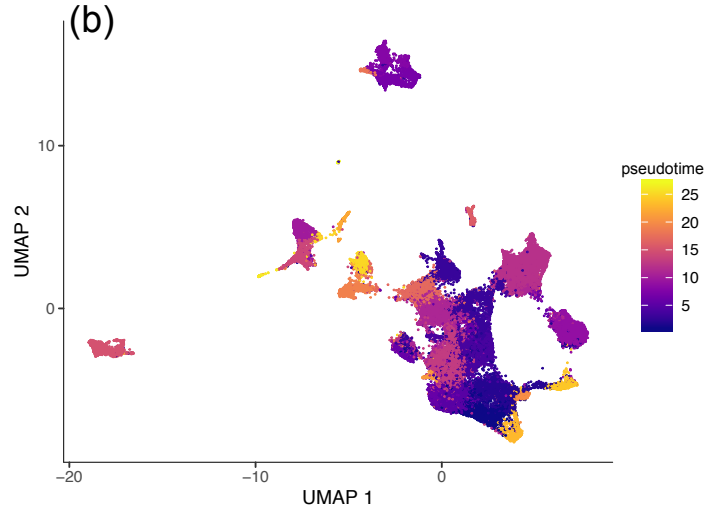

Supplement: mmc4.pdf [file mmc4.pdf]
